# Supplementary material for: Enzyme responsive nucleotide functionalized silver nanoparticles with effective antimicrobial and anticancer activity
Source: Royal Society of Chemistry journal article supplement (doi:10.1039/c6nj02955h), 2017-01-01
Supplement: c6nj02955h1.pdf [file c6nj02955h1.pdf]

## Electronic Supplementary Information

### Enzyme Responsive Nucleotide Functionalized Silver Nanoparticles with Effective Antimicrobial & Anticancer Activity

Lakshmi Priya Datta<sup>a</sup>, Ananya Chatterjee<sup>b</sup>, Krishnendu Acharya<sup>b</sup>, Priyadarsi De<sup>c</sup> and  
Mahuya Das<sup>\*a</sup>

<sup>a</sup>Department of Nanoscience and Technology, JIS College of Engineering, Kalyani-  
741235, Nadia, West Bengal, India

<sup>b</sup>Centre of Advanced Study, Department of Botany, 35, Ballygunge Circular Road,  
University of Calcutta, Kolkata- 700019, India

<sup>c</sup>Polymer Research Centre, Department of Chemical Sciences, Indian Institute of Science  
Education and Research Kolkata, Mohanpur - 741246, Nadia, West Bengal, India

\*Author to whom correspondence should be addressed; E-mail: [d\\_mahuya@yahoo.com](mailto:d_mahuya@yahoo.com),

Telephone/Fax number: +91339830525456/+913325822158

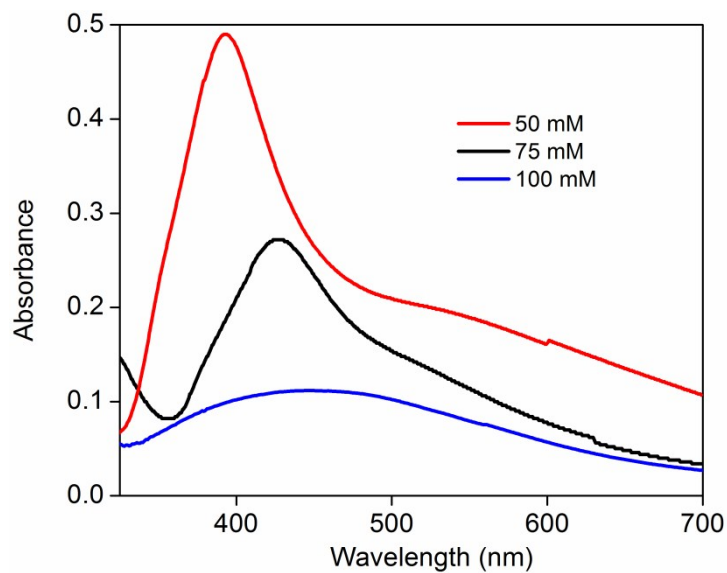

**Fig S1.** UV-Vis spectral feature regarding formation of ATP coated AgNPs at higher metallic concentration.

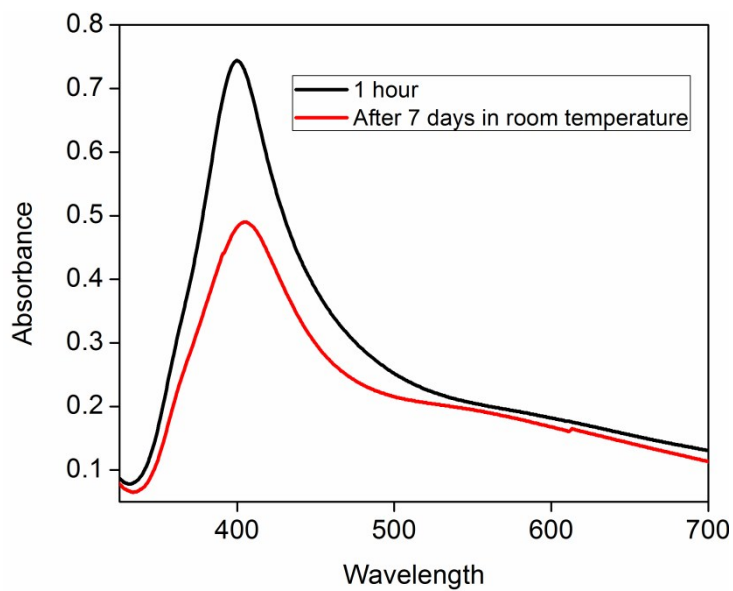

**Fig S2.** UV-Vis spectral feature regarding formation of uncoated AgNPs under similar reaction condition and after 7 days.

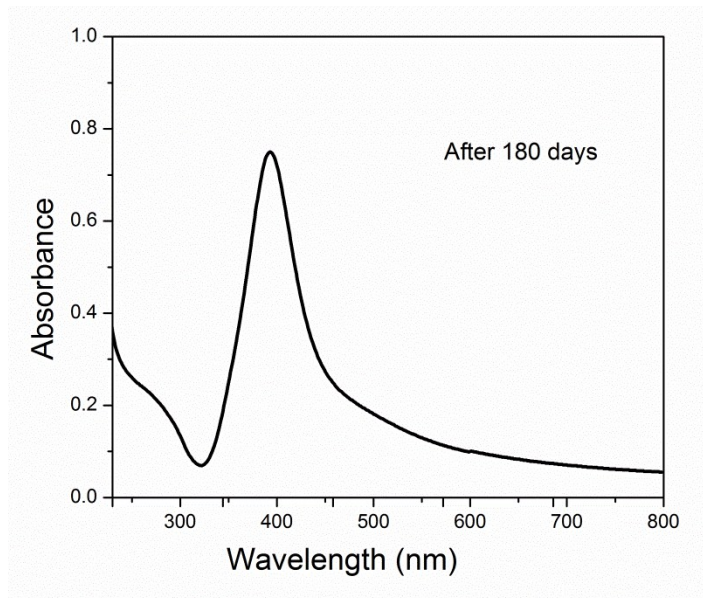

**Fig S3.** UV-Vis spectral feature regarding formation of ATP coated AgNPs after 180 days of synthesis.

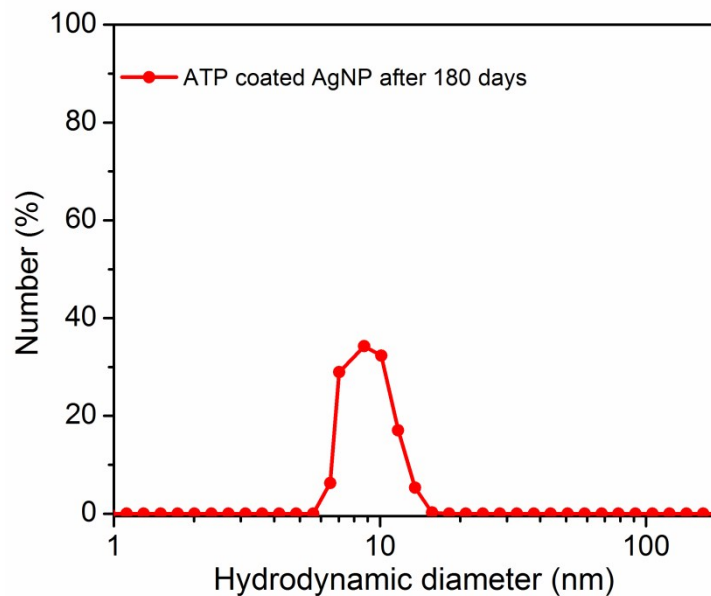

**Fig S4.** DLS Characterization of ATP coated AgNPs after 180 days of synthesis.

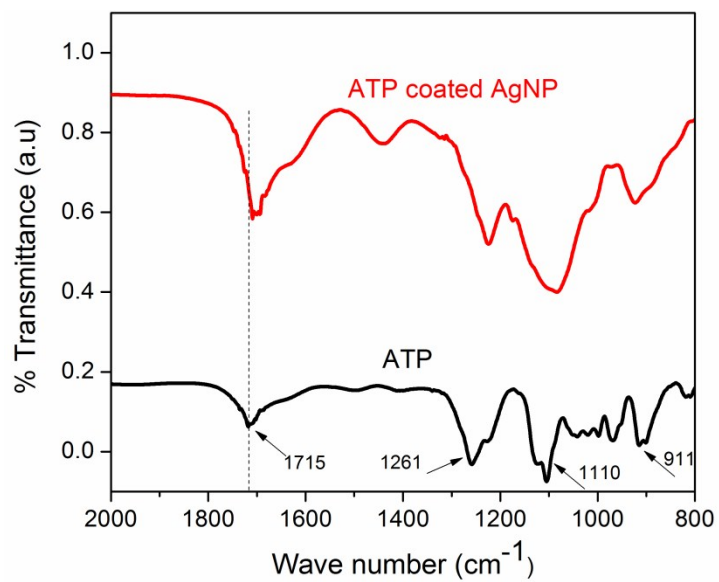

**Fig S5.** FT-IR spectra of ATP and ATP coated AgNPs.

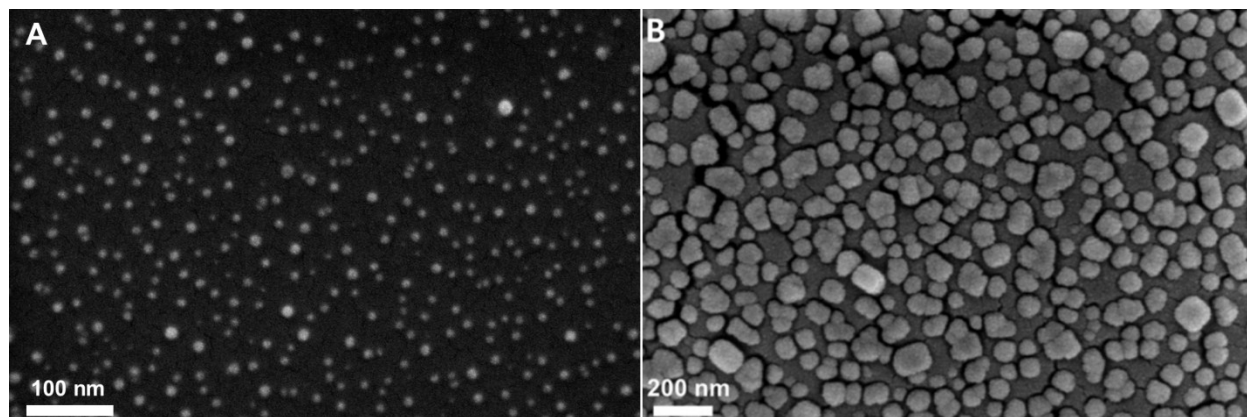

**Fig S6.** SEM images of the ATP coated AgNPs: (A) at lower concentration of metal ion and (B) higher concentration of metal ion.

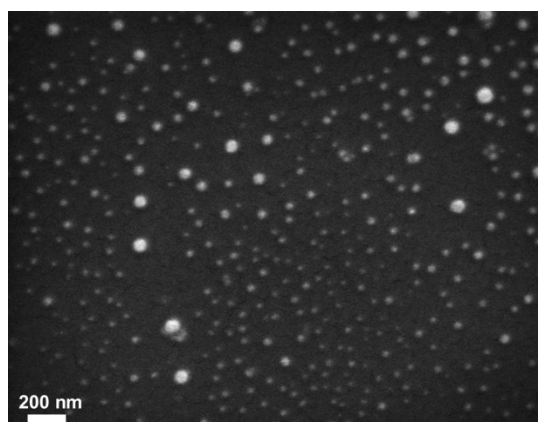

**Fig S7.** SEM images of the uncoated AgNPs.

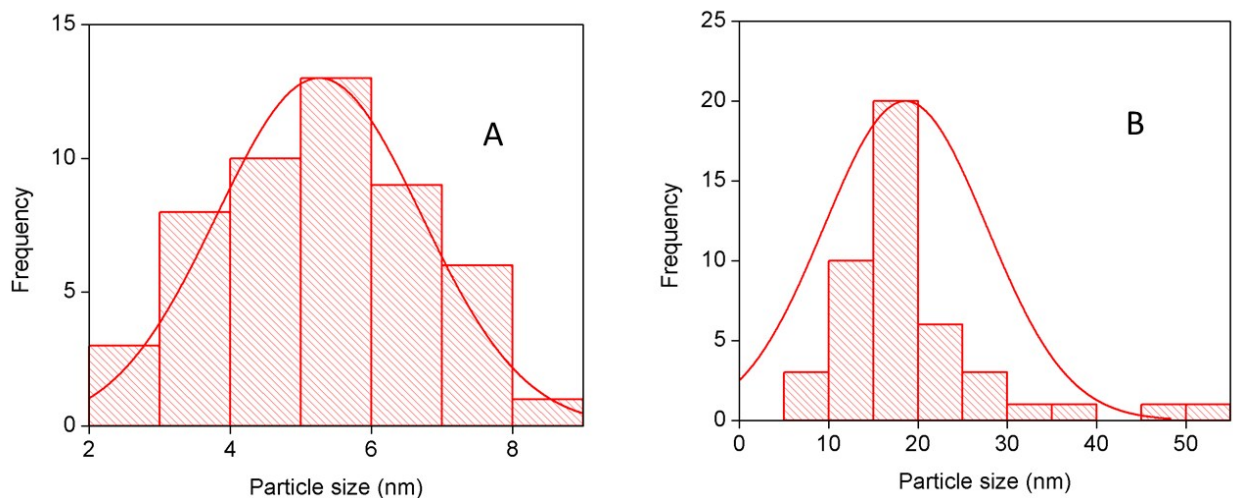

**Fig S8.** Particle size distribution from SEM images of the (A) ATP coated AgNPs and (B) uncoated AgNPs.

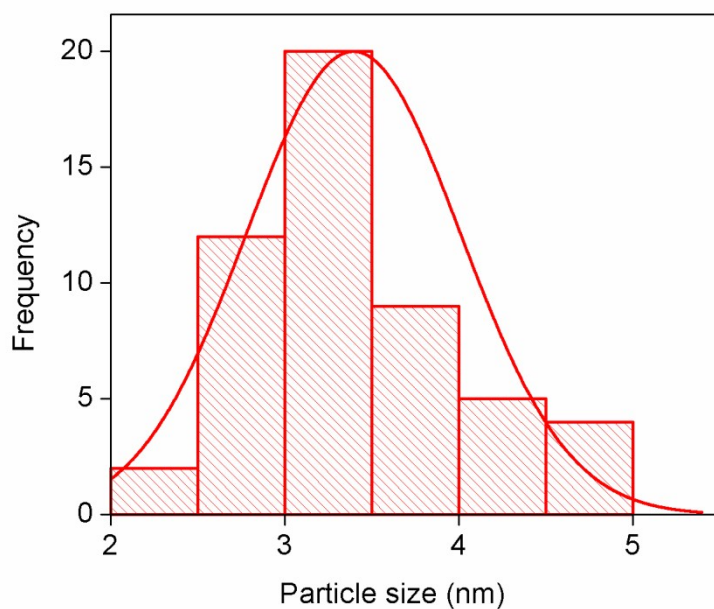

**Fig S9.** Particle size distribution from TEM images of the ATP coated AgNPs with metallic concentration 10 mM.

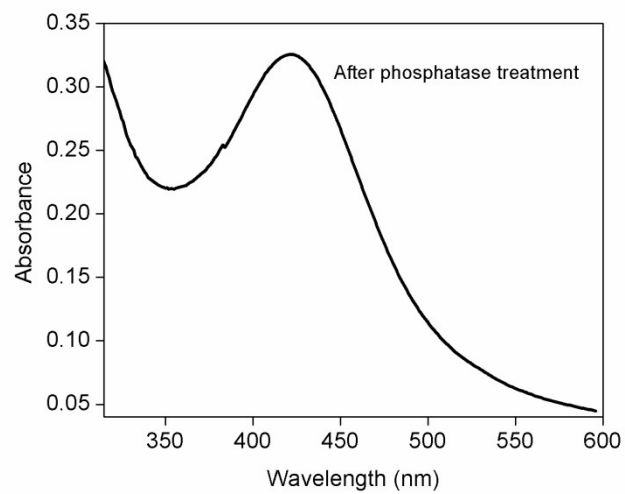

**Fig S10.** UV-Vis spectral feature after treatment with phosphatase enzyme.

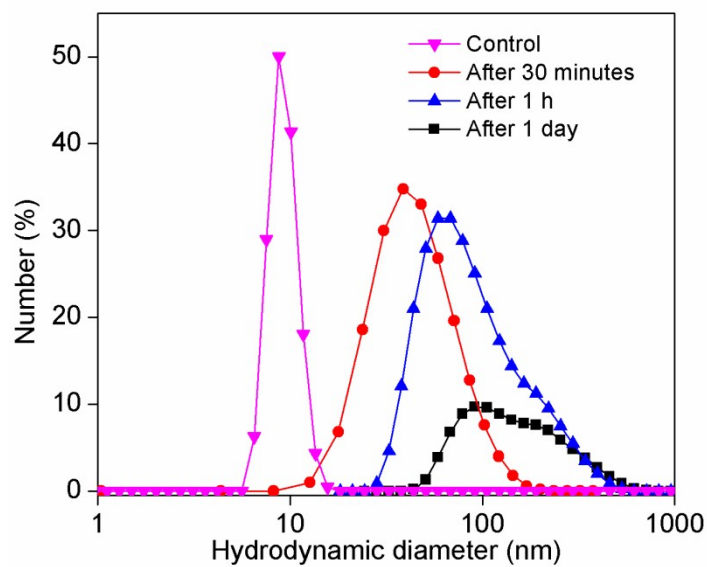

**Fig S11.** DLS Characterization of ATP coated AgNPs after treatment with phosphatase enzyme.

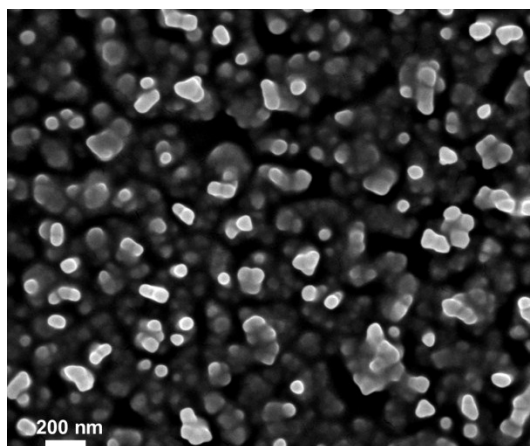

**Fig S12.** SEM images of the ATP coated AgNPs after phosphatase enzyme treatment.

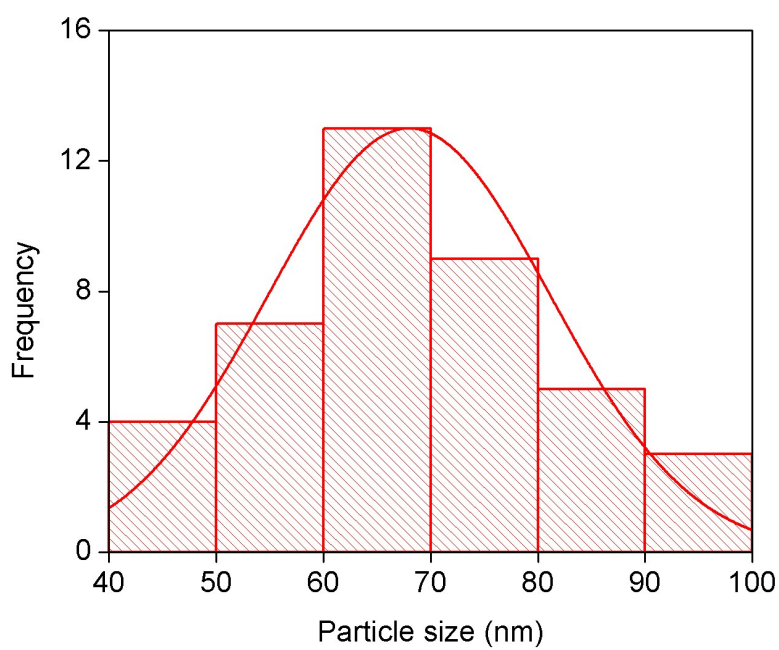

**Fig S13.** Particle size distribution from SEM images of ATP coated AgNPs after phosphatase treatment.



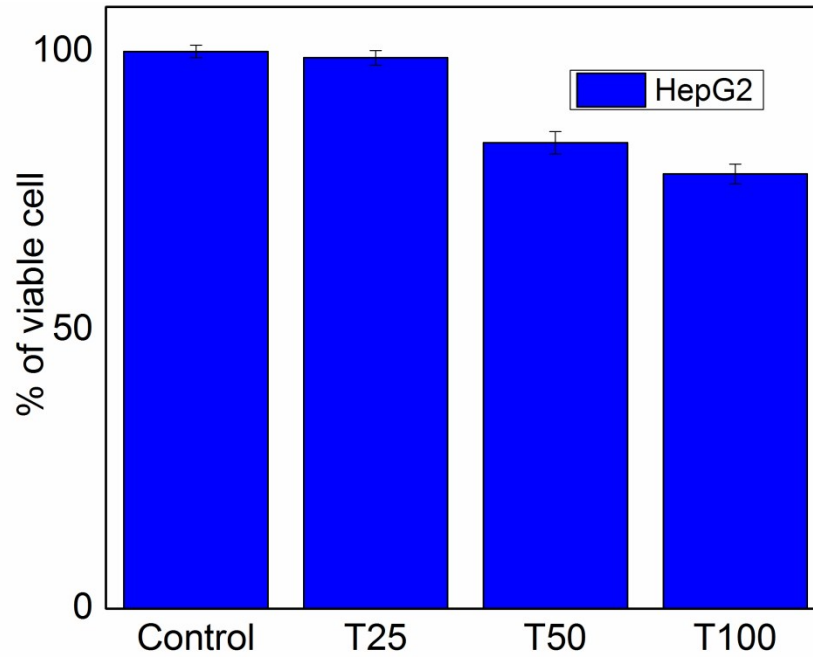

**Fig S14.** Cell viability study of uncoated AgNPs on the human liver cancer cell line (HepG<sub>2</sub>). Cell viability was studied by WST-1 cell viability assay kit at 24h.

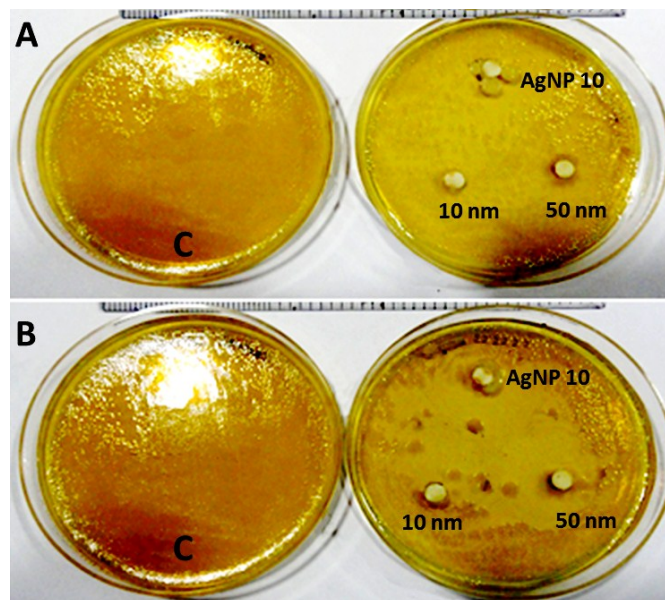

**Fig S15.** Zone of inhibition experiment of different sized silver nanoparticles against (A) *P. aeruginosa* (gram-negative) and (B) *S. aureus* (gram-positive) bacteria.
